# Supplementary material for: The Hippo Pathway Transducers YAP1/TEAD Induce Acquired Resistance to Trastuzumab in HER2-Positive Breast Cancer
Source: Cancers (Basel). 2020 Apr 29;12(5):1108. doi: 10.3390/cancers12051108 (PMC7281325; doi:10.3390/cancers12051108)

# Supplementary Materials: The Hippo Pathway Transducers YAP1/TEAD Induce Acquired Resistance to Trastuzumab in HER2-Positive Breast Cancer

Paula González-Alonso, Sandra Zazo, Ester Martín-Aparicio, Melani Luque, Cristina Chamizo, Marta Sanz-Álvarez, Pablo Minguez, Gonzalo Gómez-López, Ion Cristóbal, Cristina Caramés, Jesús García-Foncillas, Pilar Eroles, Ana Lluch, Oriol Arpi, Ana Rovira, Joan Albanell, Sander R. Piersma, Connie R. Jimenez, Juan Madoz-Gúrpide and Federico Rojo

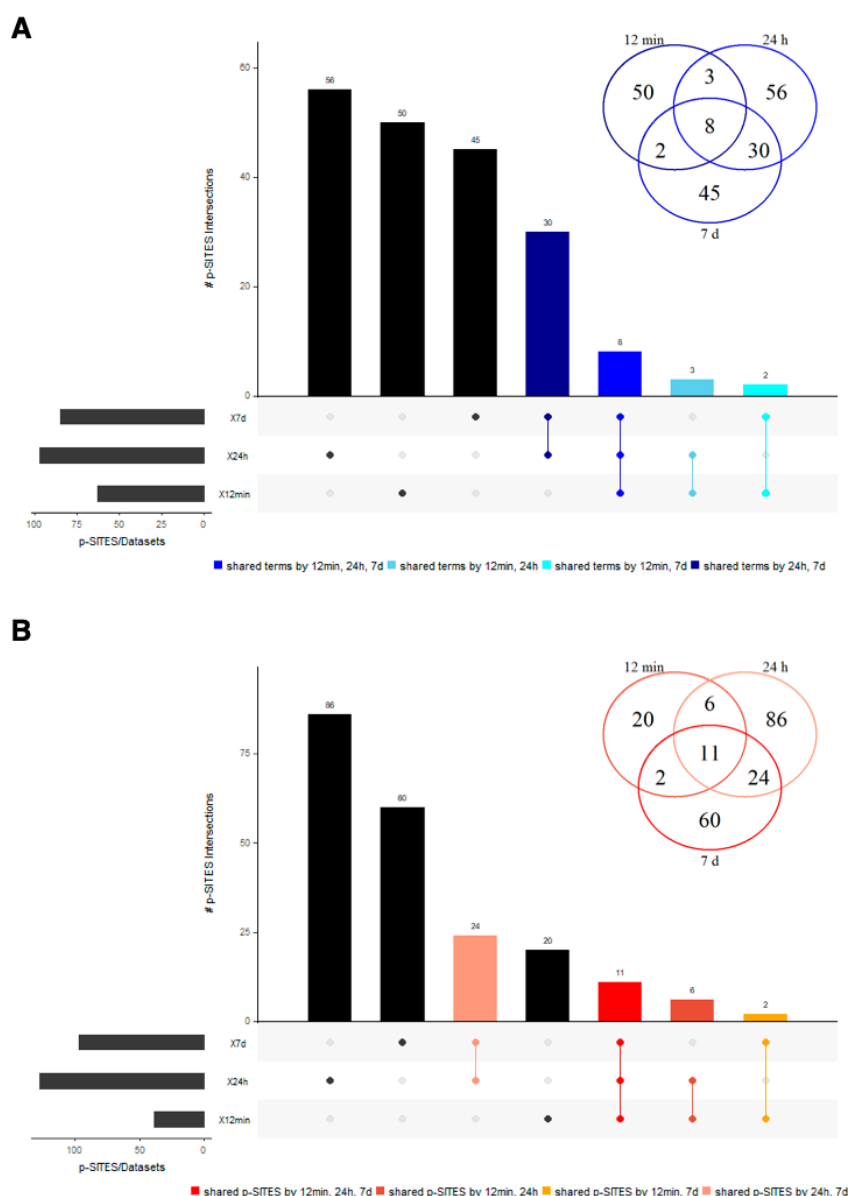

overlapping biomarkers in three out of three time data sets are centered in the diagram. Bar graphs show number of candidates from intersections where two sets out of three overlap and those that are unique to each data set. All candidates showed at least  $\geq 1.5$ -fold differences. **A.** Negative regulation (blue scale). **B.** Positive regulation (red scale).

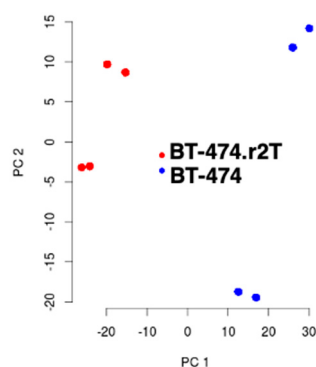

**Figure S2.** Principal Component Analysis (PCA) of probe-level gene expression data. BT-474 and BT-474.r2T cells were grown at both basal and trastuzumab treatment conditions, and duplicate samples were generated for every condition. PCA showed that the results could be explained from only two main components, one related with the resistance, and the second one with the treatment.

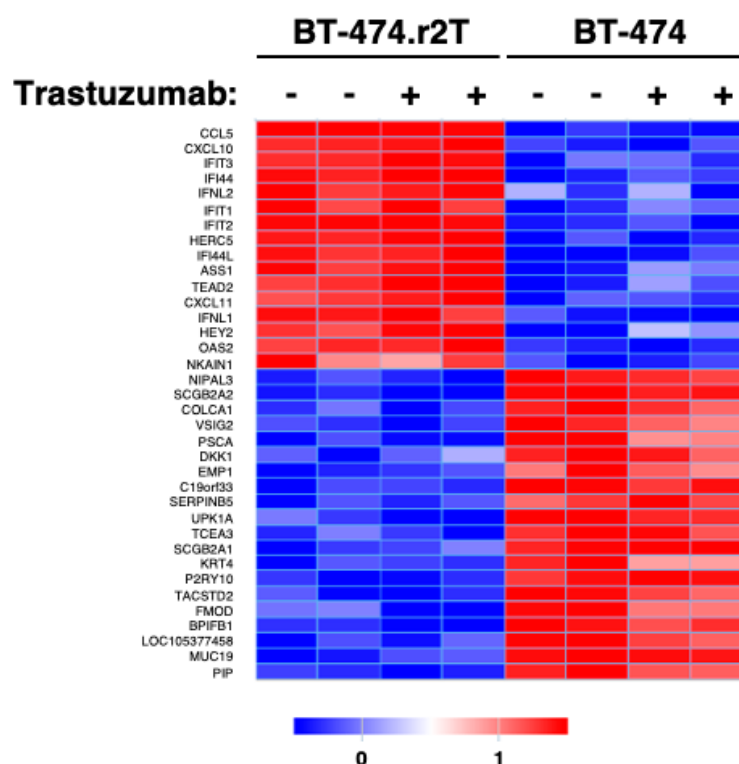

**Figure S3.** Heatmap showing relative gene expression in BT-474.r2T and BT-474 cells, both under baseline conditions, and after treatment with 15 mg/ml trastuzumab for 48 h. Thirty-six genes showed trastuzumab-independent differential regulation of gene expression in BT-474 and BT-474.r2T cells (16 genes were significantly upregulated in BT-474.r2T cells, whereas 20 genes were significantly downregulated).

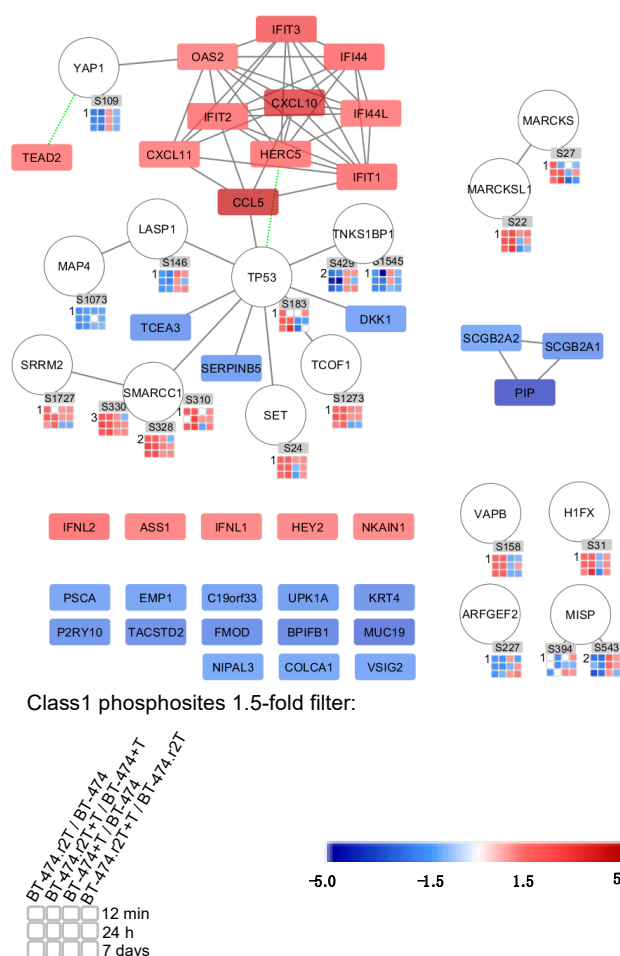

**Figure S4.** Prediction map of molecular interactions involved in our model of acquired resistance to trastuzumab, according to phosphorylation signals of the identified candidates by SILAC phosphoproteomic analysis (overlap within 3 temporary datasets,  $\geq 1.5$ -fold change) and mRNA expression microarrays (BT-474 vs. BT-474.rT cells, both untreated and treated with trastuzumab,  $\geq 2$ -fold change). Rectangles represent identified mRNA, and color scale describes change in expression. Ellipses depict proteins; phosphorylated residues are indicated, and small squares show quantification time points for SILAC experiments. Blue scale color shows negative regulation (8 phosphosites, 19 mRNAs); red color describes positive regulation (11 phosphosites, 16 mRNAs); yellow depicts known kinases; white-labelled time points stand for missing values. Class-1 phosphosites were selected for a FC  $> 1.5$ .

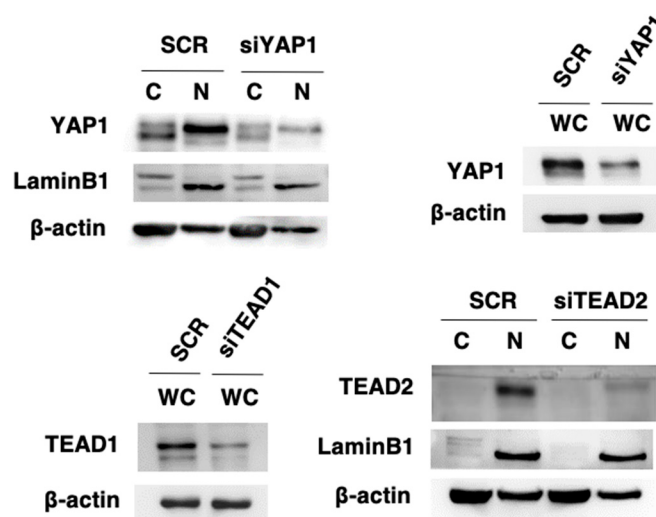

**Figure S5.** Immunoblotting analysis confirmed the reduction in protein abundance levels for YAP1, TEAD1, and TEAD2 after RNA silencing. The panels show the effects of siRNAs in cytoplasm (C) and nuclear (N) extracts of BT-474.r2T cells, and whole-cell (WC) lysates.

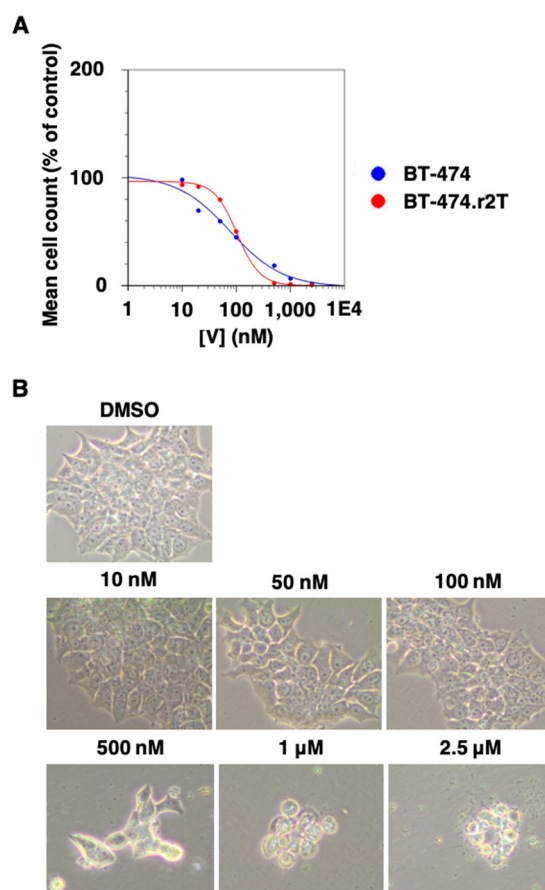

**Figure S6. A.** Verteporfin dose-response curve after 7 days of culture in BT-474 (IC<sub>50</sub> = 77 nM; IC<sub>20</sub> = 15 nM) and BT-474.r2T (IC<sub>50</sub> = 104 nM; IC<sub>20</sub> = 53 nM) cell lines. **B.** Representative phase contrast images of trastuzumab-resistant BT-474.r2T cells treated at growing concentrations of verteporfin.

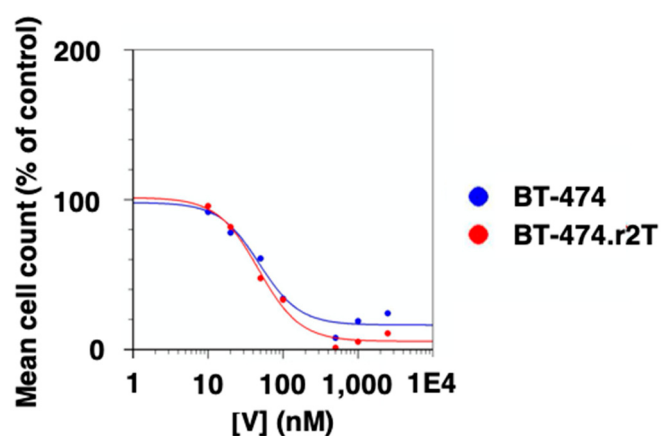

**Figure S7.** Combination treatment of trastuzumab plus verteporfin: synergy studies in BT-474 and BT-474.r2T to establish a dual working concentration. The verteporfin IC<sub>50</sub> was determined in the BT-474 cell line (IC<sub>50</sub> = 48 nM), and in resistant BT-474.r2T cell line (IC<sub>50</sub> = 33 nM), concomitantly treated with 15 µg/ml trastuzumab.

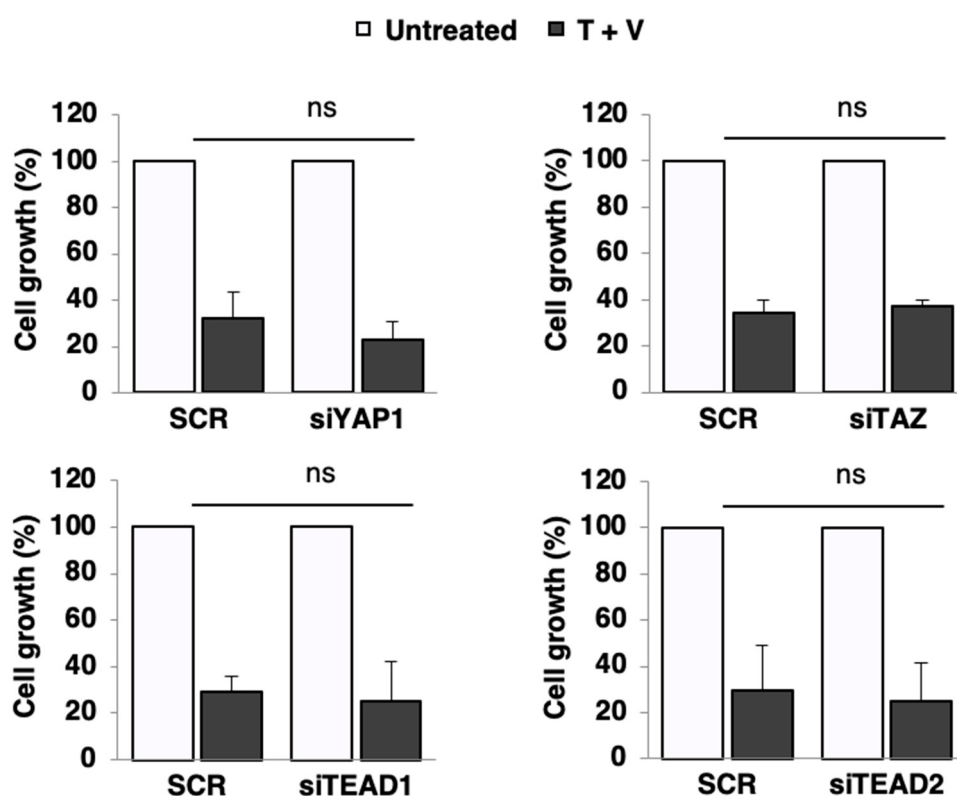

**Figure S8.** Effect of 20 nM verteporfin treatment (in combination with 15 µg/mL trastuzumab) in BT-474 cell line proliferation, after silencing of the different Hippo pathway transducers.

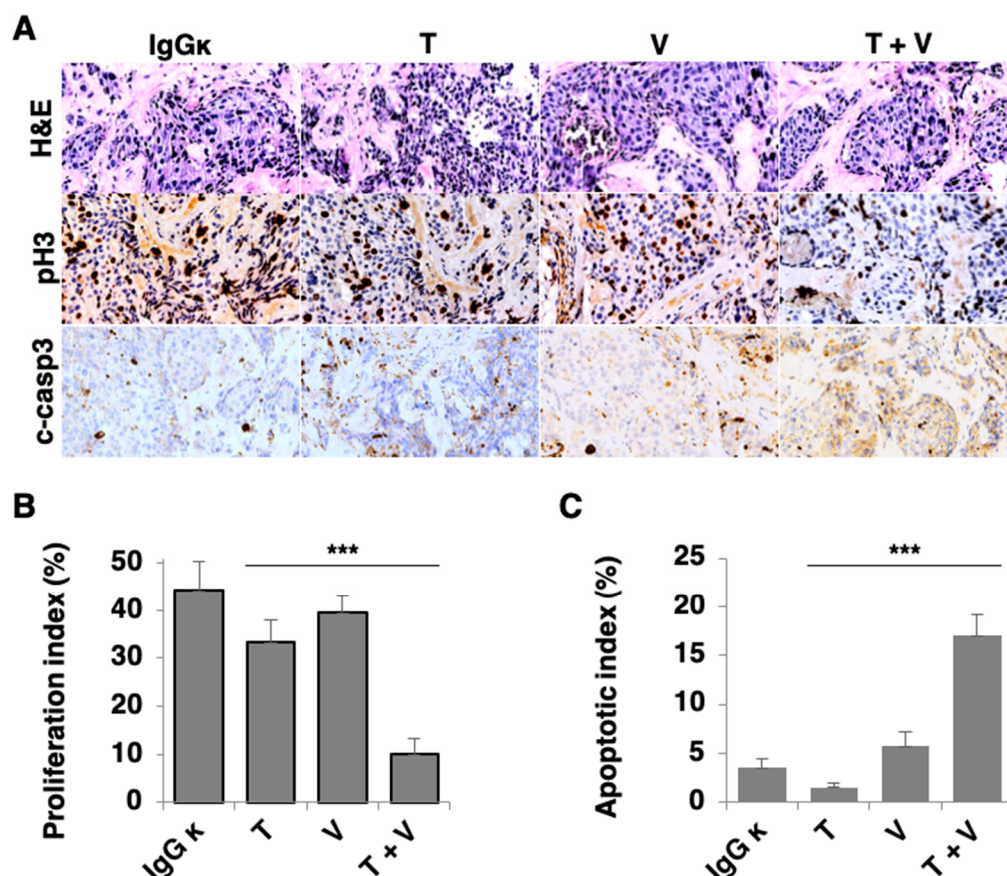

**Figure S9.** Combined treatment of 10 mg/kg trastuzumab with 40 mg/kg verteporfin significantly reduced proliferation and increased apoptosis of trastuzumab-resistant xenograft tumors. **A.** Representative IHC images of pH3 staining and c-casp3 of FFPE sections from BT-474.r2T xenografts. DAB stain; hematoxylin counterstain ( $\times 400$  magnification). **B.** IHC detection of pH3 and **C.** c-casp3 expression in tumor samples from the different groups of treatment in the murine model. All results are mean  $\pm$  s.e.m. values ( $n = 5$ ).

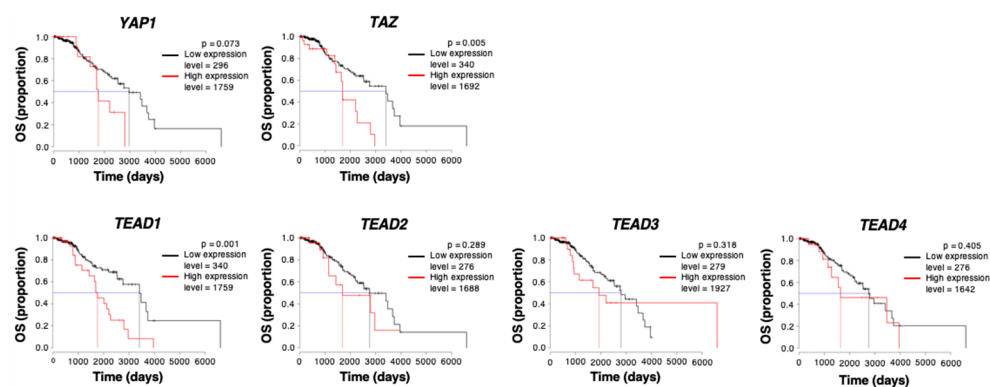

**Figure S10.** OS for a series of TCGA samples from breast primary cancer patients, according to their expression levels of different Hippo pathway effectors. Median survival is specified for both low and high expression levels for every marker.

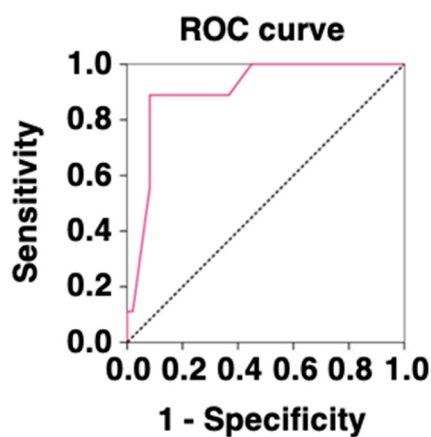

**Figure S11.** ROC curve in metastatic setting (clinical endpoint: early progression). Cutoff: 20–50% of tumor cells.

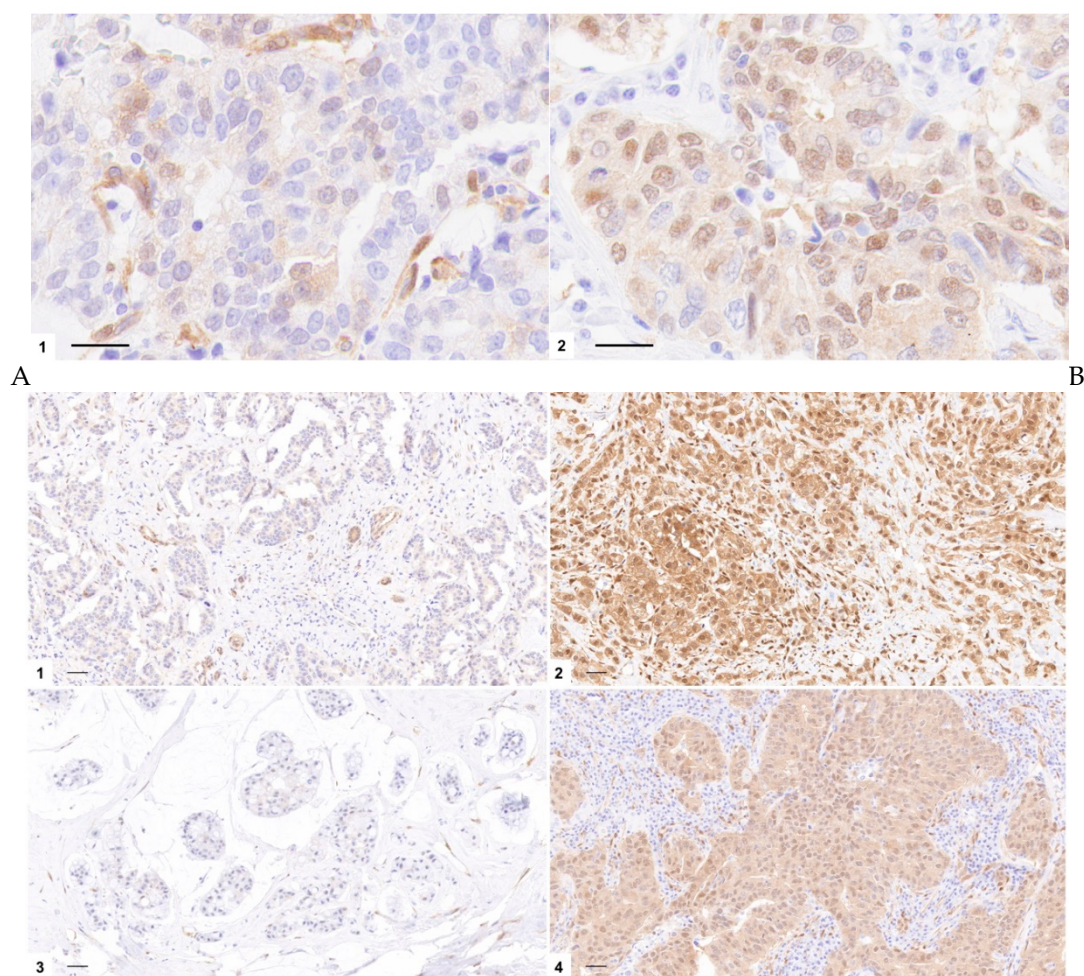

**Figure S12.** Representative IHC images of YAP1 staining from **A**. A paired sample pre-therapy (1) and post-therapy (2) with trastuzumab from a tumor of a patient who progressed to the treatment. **B**. Neoadjuvant samples from four different breast cancer patients. Bars: 50  $\mu$ m. DAB stain; hematoxylin counterstain; microscopic magnification  $\times 400$ .

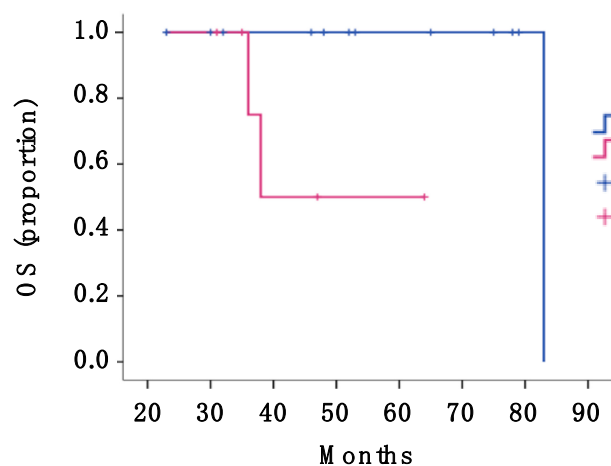

**Figure S13.** OS for pre- and post-treatment paired samples from metastatic breast cancer patients, stratified by upregulation or not of YAP1 expression levels ( $p = 0.023$ ).

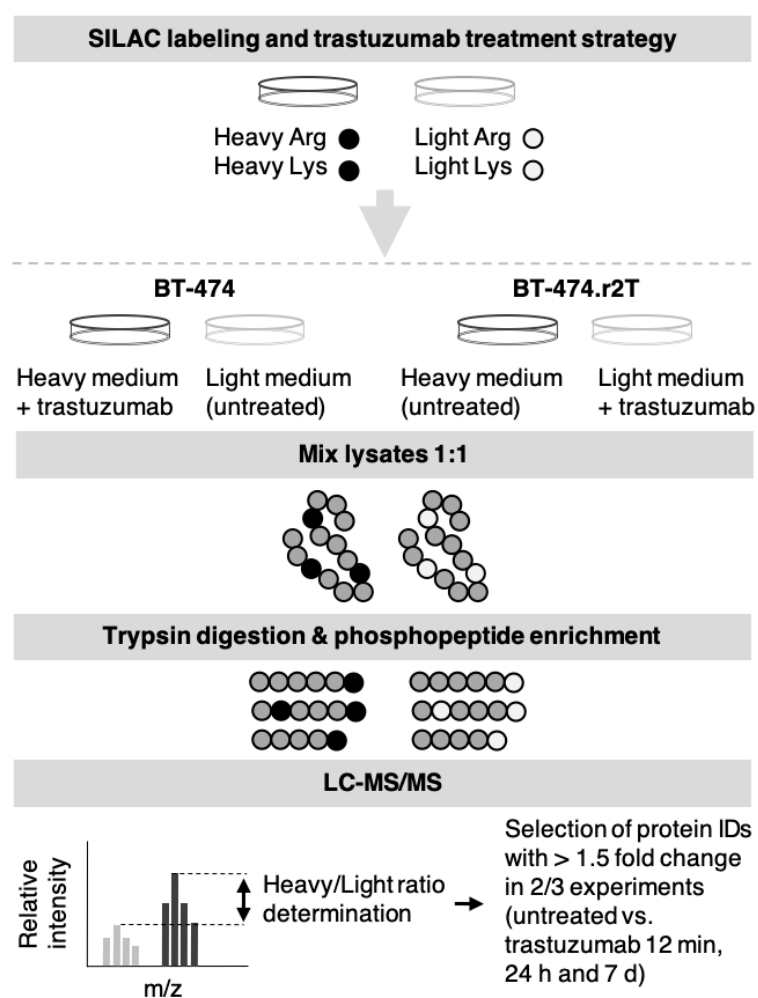

**Figure S14.** A. Experimental workflow for the SILAC experiment. BT-474 and BT-474.r2T cells were either untreated or treated with 15  $\mu\text{g/ml}$  of trastuzumab for 12 min or 7 days and lysed. Lysates were digested and enriched for phosphopeptides by  $\text{TiO}_2$  columns prior to mass spectrometry analysis. Protein identification was performed by MaxQuant and relative phosphorylation was determined by SILAC quantitation of phosphopeptides.

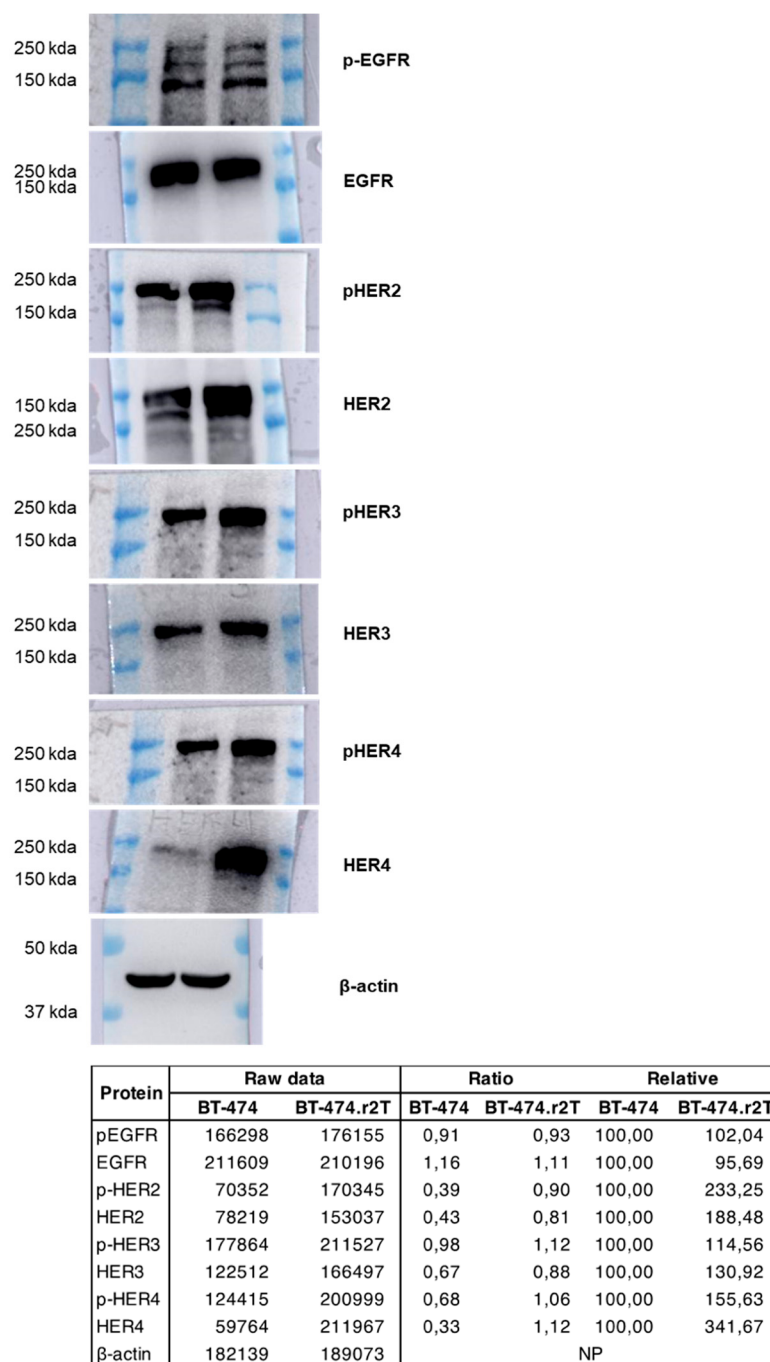

Figure 1A

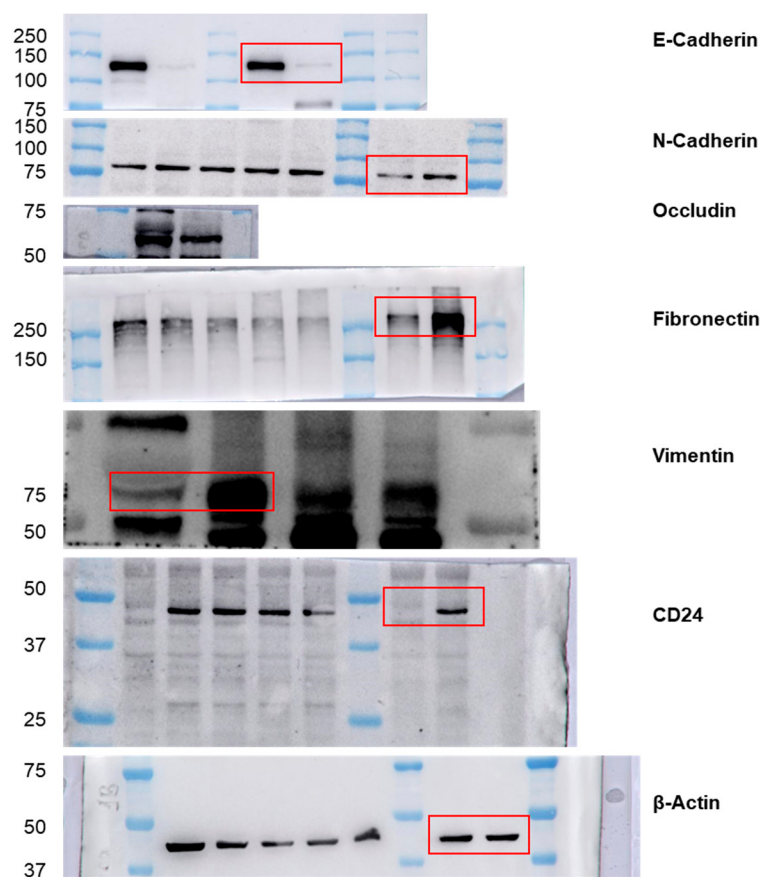

|           | raw data             |                    |                      |                       |                    |                |          |
|-----------|----------------------|--------------------|----------------------|-----------------------|--------------------|----------------|----------|
|           | E-Cadherin           | Occludin           | N-Cadherin           | Fibronectin           | Vimentin           | CD24           | β-Actin  |
| BT474     | 24289045             | 78984730           | 12384439             | 10041983              | 13997631           | 6074539        | 29846844 |
| BT474.rT2 | 1587669              | 43901312           | 20689439             | 26010782              | 30548631           | 19903953       | 30178522 |
|           | ratio                |                    |                      |                       |                    |                |          |
|           | E-Cadherin / β-actin | Occludin / β-actin | N-Cadherin / β-actin | Fibronectin / β-actin | Vimentin / β-actin | CD24 / β-actin |          |
| BT474     | 0,81                 | 2,65               | 0,41                 | 0,34                  | 0,47               | 0,20           |          |
| BT474.rT2 | 0,05                 | 1,45               | 0,69                 | 0,86                  | 1,01               | 0,66           |          |
|           | normalization        |                    |                      |                       |                    |                |          |
|           | E-Cadherin           | Occludin           | N-Cadherin           | Fibronectin           | Vimentin           | CD24           |          |
| BT474     | 1,00                 | 1,00               | 1,00                 | 1,00                  | 1,00               | 1,00           | 1,00     |
| BT474.rT2 | 0,06                 | 0,55               | 1,65                 | 2,56                  | 2,16               | 3,24           |          |

Figure 1B

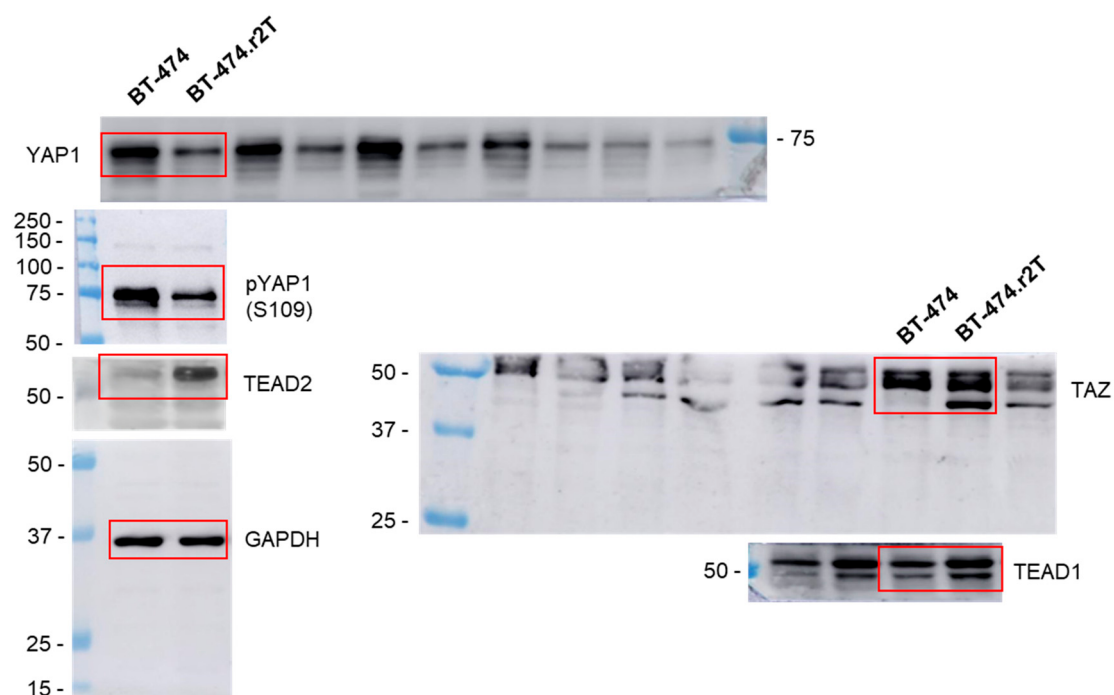

| Protein      | Raw data |            | Ratio  |            | Relative |            |
|--------------|----------|------------|--------|------------|----------|------------|
|              | BT-474   | BT-474.r2T | BT-474 | BT-474.r2T | BT-474   | BT-474.r2T |
| YAP1         | 211285   | 148269     | 1,34   | 1,01       | 100,00   | 75,18      |
| pYAP1 (S109) | 182536   | 121706     | 1,16   | 0,83       | 100,00   | 71,43      |
| TAZ          | 136897   | 167048     | 0,87   | 1,14       | 100,00   | 130,74     |
| TEAD1        | 155547   | 184760     | 1,17   | 1,06       | 100,00   | 90,20      |
| TEAD2        | 28150602 | 46960584   | 178,55 | 319,12     | 100,00   | 178,73     |
| GAPDH        | 157662   | 147157     |        |            |          |            |

Figure 4B

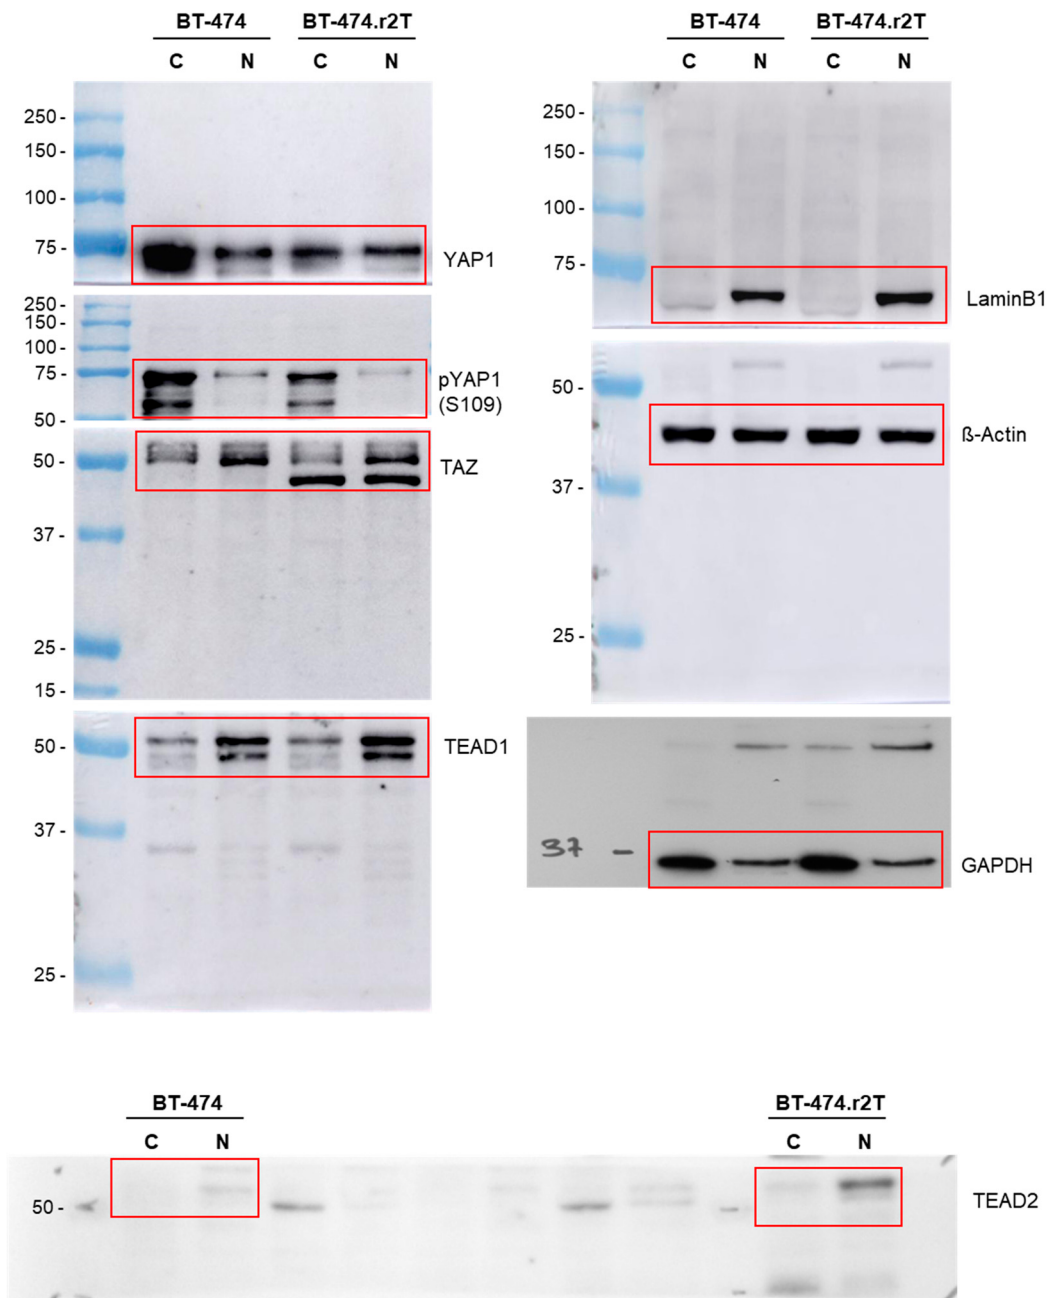

Figure 4C (I)

| protein     | intensity value | normalization1 | normalization2 | ratio lane#/lane1 |
|-------------|-----------------|----------------|----------------|-------------------|
| β-Actin     | 15946,15        | 1,00           | 1,00           | 1,00              |
|             | 13982,00        | 0,88           | 1,00           | 1,00              |
|             | 15478,42        | 0,97           | 1,00           | 1,00              |
|             | 12669,30        | 0,79           | 1,00           | 1,00              |
| YAP1        | 25460,82        | 1,60           | 1,60           | 1,00              |
|             | 13686,77        | 0,98           | 1,12           | 0,70              |
|             | 14974,72        | 0,97           | 1,00           | 0,62              |
|             | 13999,02        | 1,10           | 1,39           | 0,87              |
| pYAP1(S109) | 24241,51        | 1,52           | 1,52           | 1,00              |
|             | 6978,97         | 0,50           | 0,57           | 0,37              |
|             | 21632,29        | 1,40           | 1,44           | 0,95              |
|             | 4198,19         | 0,33           | 0,42           | 0,27              |
| TAZ         | 9590,51         | 0,60           | 0,60           | 1,00              |
|             | 16253,92        | 1,16           | 1,33           | 2,20              |
|             | 17295,68        | 1,12           | 1,15           | 1,91              |
|             | 23985,36        | 1,89           | 2,38           | 3,96              |
| TEAD1       | 7197,54         | 0,45           | 0,45           | 1,00              |
|             | 19430,41        | 1,39           | 1,58           | 3,51              |
|             | 9115,27         | 0,59           | 0,61           | 1,34              |
|             | 22687,63        | 1,79           | 2,25           | 4,99              |
| TEAD2       | 810,02          | 0,05           | 0,05           | 1,00              |
|             | 2102,05         | 0,15           | 0,17           | 3,38              |
|             | 1996,04         | 0,13           | 0,13           | 2,62              |
|             | 8378,37         | 0,66           | 0,83           | 16,39             |
| laminB      | 3756,50         | 0,24           | 0,24           | 1,00              |
|             | 11858,78        | 0,85           | 0,97           | 4,11              |
|             | 2739,52         | 0,18           | 0,18           | 0,77              |
|             | 14390,00        | 1,14           | 1,43           | 6,07              |
| GAPDH       | 15526,15        | 0,97           | 0,97           | 1,00              |
|             | 3964,00         | 0,28           | 0,32           | 0,33              |
|             | 16457,36        | 1,06           | 1,10           | 1,13              |
|             | 5567,64         | 0,44           | 0,55           | 0,57              |

Figure 4C (II)

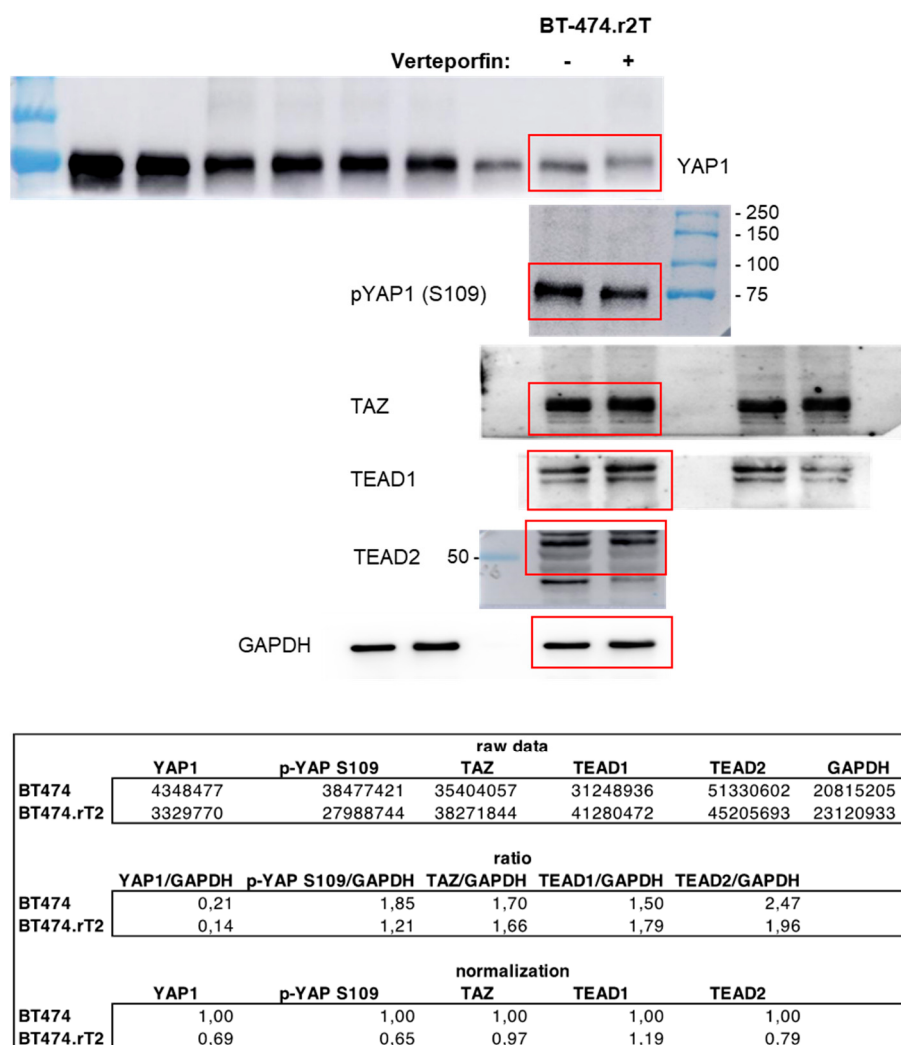

Figure 6B

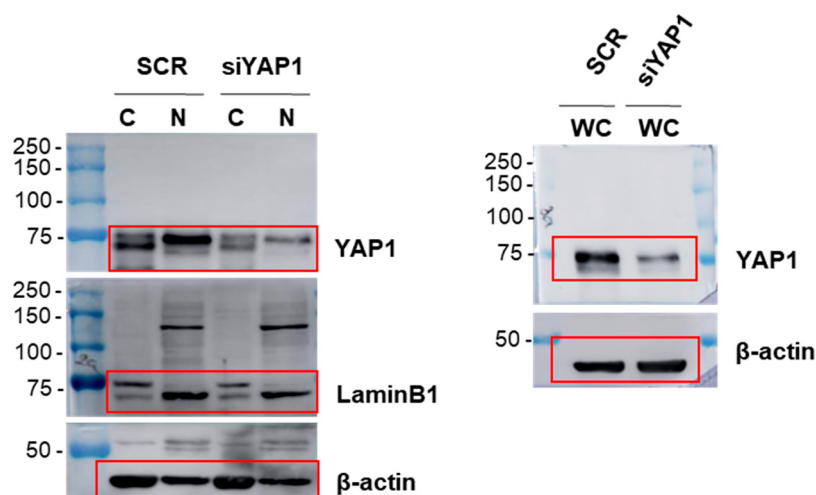

| raw data            |                |                       |                |           |                       |                |
|---------------------|----------------|-----------------------|----------------|-----------|-----------------------|----------------|
| siYAP1 fractionated |                |                       |                | siYAP1 WC |                       |                |
|                     | YAP1           | LaminB1               | $\beta$ -actin |           | YAP1                  | $\beta$ -actin |
| SCR C               | 21068652       | 8094004               | 22367865       | SCR       | 32832915              | 50789329       |
| SCR N               | 25560752       | 14298853              | 10418116       | siYAP1    | 12192702              | 49996551       |
| siYAP1 C            | 11569731       | 6235418               | 23511602       |           |                       |                |
| siYAP1 N            | 8905853        | 9513681               | 11223785       |           |                       |                |
| ratio               |                |                       |                |           |                       |                |
| siYAP1 fractionated |                |                       |                | siYAP1 WC |                       |                |
|                     | YAP1 / LaminB1 | YAP1 / $\beta$ -actin |                |           | YAP1 / $\beta$ -actin |                |
| SCR C               | 2,60           | 0,94                  |                | SCR       | 0,65                  |                |
| SCR N               | 1,79           | 2,45                  |                | siYAP1    | 0,24                  |                |
| siYAP1 C            | 1,86           | 0,49                  |                |           |                       |                |
| siYAP1 N            | 0,94           | 0,79                  |                |           |                       |                |
| normalization       |                |                       |                |           |                       |                |
| siYAP1 fractionated |                |                       |                | siYAP1 WC |                       |                |
|                     | LaminB1        |                       |                |           | YAP1                  |                |
| SCR N               | 1,00           |                       |                | SCR       | 1,00                  |                |
| siYAP1 N            | 0,52           |                       |                | siYAP1    | 0,38                  |                |
|                     | $\beta$ -actin |                       |                |           |                       |                |
| SCR C               | 1,00           |                       |                |           |                       |                |
| siYAP1 C            | 0,52           |                       |                |           |                       |                |

Supplementary Figure S5(I)

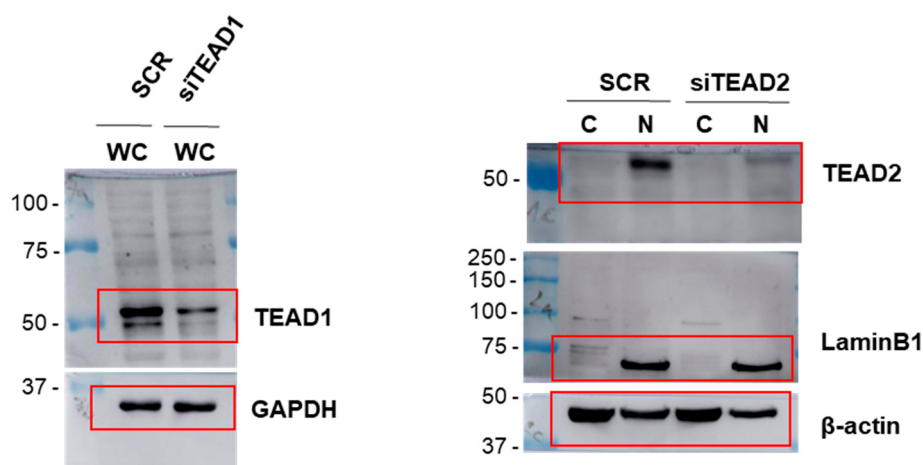

| raw data             |                 |                 |          |            |                 |          |
|----------------------|-----------------|-----------------|----------|------------|-----------------|----------|
| siTEAD2 fractionated |                 |                 |          | siTEAD1 WC |                 |          |
|                      | TEAD2           | LaminB1         | β-actin  |            | TEAD1           | β-actin  |
| SCR C                | 4229986         | 4688986         | 25560095 | SCR        | 37021744        | 22324317 |
| SCR N                | 22558095        | 30154756        | 15138317 | siTEAD1    | 16838744        | 22805903 |
| siTEAD2 C            | 3077983         | 1905861         | 22927560 |            |                 |          |
| siTEAD2 N            | 9330844         | 20404404        | 14134317 |            |                 |          |
| ratio                |                 |                 |          |            |                 |          |
| siTEAD2 fractionated |                 |                 |          | siTEAD1 WC |                 |          |
|                      | TEAD2 / LaminB1 | TEAD2 / β-actin |          |            | TEAD1 / β-actin |          |
| SCR C                | 0,90            | 0,17            |          | SCR        | 1,66            |          |
| SCR N                | 0,75            | 1,49            |          | siTEAD1    | 0,74            |          |
| siTEAD2 C            | 1,62            | 0,13            |          |            |                 |          |
| siTEAD2 N            | 0,46            | 0,66            |          |            |                 |          |
| normalization        |                 |                 |          |            |                 |          |
| siTEAD2 fractionated |                 |                 |          | siTEAD1 WC |                 |          |
|                      | LaminB1         |                 |          |            | TEAD1           |          |
| SCR N                | 1,00            |                 |          | SCR        | 1,00            |          |
| siTEAD2 N            | 0,61            |                 |          | siTEAD1    | 0,45            |          |
| β-actin              |                 |                 |          |            |                 |          |
| SCR C                | 1,00            |                 |          |            |                 |          |
| siTEAD2 C            | 1,23            |                 |          |            |                 |          |

Supplementary Figure S5 (II)

Figure S15. Original WB images and densitometric analysis for all the WB figures presented in this work.

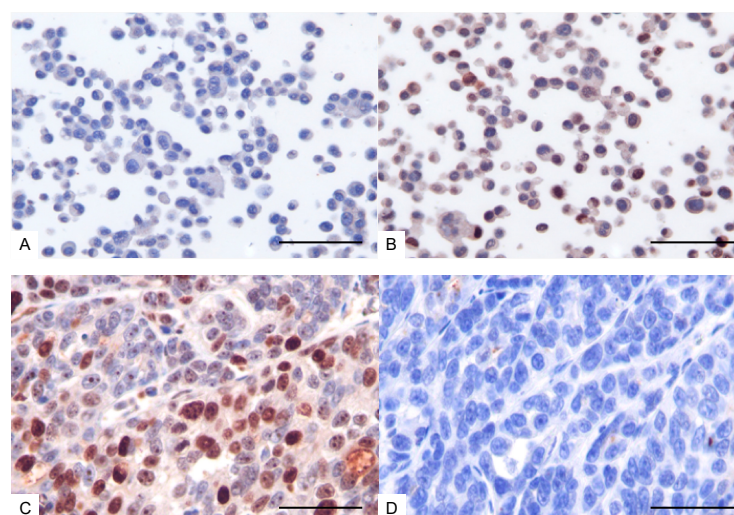

**Figure S16.** Positive control on BT-474 cells. Formalin-fixed and paraffin-embedded pellets were obtained from parental, trastuzumab-sensitive BT-474 cell line (A) and resistant (B) BT-474.r2T cells. IHC assay for YAP1 expression was performed as described. Nuclear and faint cytoplasmic YAP1 was detected in B, whereas complete absence of expression was seen in A. Negative control in selected breast carcinoma. Sections from same specimen were incubated with YAP1 antibody (C) and with non-immunized immunoglobulin instead primary antibody (D) to demonstrate the specificity of staining method. Bars: 50  $\mu$ m. DAB stain; hematoxylin counterstain; microscopic magnification  $\times 400$ .

**Table S1.** Summary table of the proteins identified in the SILAC-based approach to identify differential regulation of the trastuzumab-resistant BT-474.r2T cell line.

| Identification Level             | 12 min |       | 24 h  |       | 7 d   |       | $\bar{X}$ |       |
|----------------------------------|--------|-------|-------|-------|-------|-------|-----------|-------|
|                                  | N      | %     | N     | %     | N     | %     | N         | %     |
| Protein groups                   | 1233   |       | 1978  |       | 1826  |       | 1679.00   |       |
| Peptides                         | 71786  |       | 97575 |       | 99872 |       | 89744.33  |       |
| Phosphosites                     | 1261   |       | 2527  |       | 2231  |       | 2006.33   |       |
| Class I phosphosites ( $>0.75$ ) | 939    | 74.46 | 1869  | 73.96 | 1665  | 74.63 | 1491.00   | 74.35 |

**Table S2.** GSEA of the differentially regulated genes in BT-474.r2T cells as compared to BT-474 (Molecular Signatures Database, Oncogenic Signature). Only top significant gene sets with FDR  $q$ -val  $< 0.005$  are shown. A. Analysis for BT-474.r2T cells at baseline conditions. B. When BT-474.r2T cells were treated with trastuzumab, a couple of extra gene sets were revealed in the analysis.

A

| Phenotype       | Gene Set        | Description                                        | NES    | FDR q-value |
|-----------------|-----------------|----------------------------------------------------|--------|-------------|
| Basal condition | ERB2_UP (V1_DN) | Correlated with breast cancer cells ERBB2-positive | 2.8128 | 0.0000      |
|                 | LTE2_UP (V1_DN) | Long-term adapted for estrogen-independent growth  | 2.6767 | 0.0000      |
|                 | MEK_UP (V1_DN)  | Expression of MAP2K1 gene                          | 2.4962 | 0.0000      |
|                 | EGFR_UP (V1_DN) | Correlated with breast cancer cells EGFR-positive  | 2.0859 | 0.0000      |

B

| Phenotype             | Gene Set            | Description                                        | NES    | FDR q-value |
|-----------------------|---------------------|----------------------------------------------------|--------|-------------|
| Trastuzumab treatment | ERB2_UP (V1_DN)     | Correlated with breast cancer cells ERBB2-positive | 2.6952 | 0.0000      |
|                       | LTE2_UP (V1_DN)     | Long-term adapted for estrogen-independent growth  | 2.4201 | 0.0000      |
|                       | CSR_LATE_UP (V1_UP) | Correlated to fibroblast serum response            | 2.3719 | 0.0000      |
|                       | RB_P107_DN (V1_UP)  | Correlated to RB1 and RBL1 specific knockouts      | 2.3278 | 0.0000      |
|                       | MEK_UP (V1_DN)      | Expression of MAP2K1 gene                          | 2.2924 | 0.0000      |

**Table S3.** Overlapping of two out of three time data sets (BH corrected  $p$ -value  $\leq 0.05$ ).

| # Accession | GO biological process                      | Observed<br>gene count | Corrected<br>p-value | Matching genes and proteins in network                                                                                                           |
|-------------|--------------------------------------------|------------------------|----------------------|--------------------------------------------------------------------------------------------------------------------------------------------------|
| GO:0009615  | response to virus                          | 13                     | 1.97E-07             | BAD, CCL5, CXCL10, DDX21, HERC5, IFI44, IFI44L, IFIT1, IFIT2, IFIT3, IL28A, IL29, OAS2                                                           |
| GO:0051607  | defense response to virus                  | 9                      | 0.00015              | CXCL10, HERC5, IFI44L, IFIT1, IFIT2, IFIT3, IL28A, IL29, OAS2                                                                                    |
| GO:0009607  | response to biotic stimulus                | 15                     | 0.000725             | ASS1, BAD, CCL5, CXCL11, DDX21, HERC5, IFI44, IFI44L, IFIT1, IFIT2, IFIT3, IL28A, IL29, OAS2, TP53                                               |
| GO:0051707  | response to other organism                 | 14                     | 0.00163              | ASS1, BAD, CCL5, CXCL11, DDX21, HERC5, IFI44, IFI44L, IFIT1, IFIT2, IFIT3, IL28A, IL29, OAS2                                                     |
| GO:0006955  | immune response                            | 19                     | 0.00188              | ASS1, BAD, BPIFB1, CCL5, CD276, CDK1, CXCL10, CXCL11, ERBB2, HERC5, IFI44L, IFIT1, IFIT2, IFIT3, IL28A, IL29, IRS1, OAS2, TP53                   |
| GO:0009967  | positive regulation of signal transduction | 19                     | 0.00188              | BAD, BCLAF1, CCL5, CDK1, CXCL10, CXCL11, DBNL, ERBB2, FLNA, IL29, IRS1, LASP1, MED1, PCM1, PEA15, PLEKHF1, PXN, TP53, YAP1                       |
| GO:0023056  | positive regulation of signaling           | 19                     | 0.00649              | BCLAF1, CCL5, CDK1, CXCL10, CXCL11, DBNL, DKK1, ERBB2, FLNA, IL29, IRS1, LASP1, MED1, PCM1, PEA15, PLEKHF1, PXN, TP53, YAP1                      |
| GO:0002376  | immune system process                      | 22                     | 0.0126               | ASS1, BAD, BPIFB1, CCL5, CD276, CDK1, CUL4A, CXCL11, DBNL, ERBB2, HERC5, IFI44L, IFIT1, IFIT2, IFIT3, IKZF3, IL28A, IL29, IRS1, OAS2, PCM1, TP53 |
| GO:0002252  | immune effector process                    | 10                     | 0.0145               | CXCL10, HERC5, IFI44L, IFIT1, IFIT2, IFIT3, IL28A, IL29, OAS2, TP53                                                                              |
| GO:0072676  | lymphocyte migration                       | 4                      | 0.0145               | CCL5, CXCL10, CXCL11, PCM1                                                                                                                       |
| GO:0010647  | positive regulation of cell communication  | 19                     | 0.0149               | BCLAF1, CCL5, CDK1, CXCL10, CXCL11, DBNL, DKK1, ERBB2, FLNA, IL29, IRS1, LASP1, MED1, PCM1, PEA15, PLEKHF1, PXN, TP53, YAP1                      |
| GO:0010941  | regulation of cell death                   | 18                     | 0.0168               | BAD, BCLAF1, CCL5, CDK1, CTTN, FLNA, HEY2, IFIT2, IFIT3, IKZF3, MED1, PCM1, PIP, PLEKHF1, SET, TEAD2, TP53, YAP1                                 |
| GO:0045595  | regulation of cell differentiation         | 18                     | 0.0168               | ARHGAP35, CCL5, CD276, CDK1, CTTN, CUL4A, CXCL10, DBN1, DKK1, ERBB2, FLNA, HEY2, IKZF3, IL29, MED1, PCM1, TEAD2, TP53                            |
| GO:0060548  | negative regulation of cell death          | 14                     | 0.0168               | BAD, CCL5, CDK1, CTTN, FLNA, HEY2, IFIT3, MED1, PEA15, PIP, SET, TEAD2, TP53, YAP1                                                               |
| GO:0045087  | innate immune response                     | 14                     | 0.0191               | ASS1, BAD, BPIFB1, CCL5, CDK1, ERBB2, HERC5, IFIT1, IFIT2, IFIT3, IL28A, IL29, IRS1, OAS2                                                        |

|            |                                                          |    |        |                                                                                                                                                                                                                                                       |
|------------|----------------------------------------------------------|----|--------|-------------------------------------------------------------------------------------------------------------------------------------------------------------------------------------------------------------------------------------------------------|
| GO:1902533 | positive regulation of intracellular signal transduction | 13 | 0.0209 | BAD, BCLAF1, CCL5, CDK1, CXCL10, CXCL11, DBNL, ERBB2, FLNA, IL29, PLEKHF1, PXN, TP53                                                                                                                                                                  |
| GO:0019221 | cytokine-mediated signaling pathway                      | 9  | 0.0219 | BAD, CCL5, CXCL10, CXCL11, HERC5, IFIT1, IFIT2, IFIT3, OAS2                                                                                                                                                                                           |
| GO:0006333 | chromatin assembly or disassembly                        | 6  | 0.0228 | H1FX, HIRIP3, MCM2, SET, SMARCC1, TP53                                                                                                                                                                                                                |
| GO:0043066 | negative regulation of apoptotic process                 | 13 | 0.023  | BAD, CCL5, CDK1, CTTN, FLNA, HEY2, IFIT3, MED1, PEA15, PIP, SET, TP53, YAP1                                                                                                                                                                           |
| GO:0060429 | epithelium development                                   | 14 | 0.023  | ARHGAP35, CDK1, DKK1, EMP1, HEY2, KRT4, PCM1, PXN, SERPINB5, TACSTD2, TEAD2, TP53, UPK1A, YAP1                                                                                                                                                        |
| GO:0071822 | protein complex subunit organization                     | 17 | 0.0273 | AHNAK, BAD, CCL5, CTTN, DBN1, DBNL, FLNA, FMOD, H1FX, MAP4, MCM2, PCM1, PXN, SET, SMARCC1, TP53, UPK1A                                                                                                                                                |
| GO:0051097 | negative regulation of helicase activity                 | 2  | 0.0313 | IFIT1, TP53                                                                                                                                                                                                                                           |
| GO:0060284 | regulation of cell development                           | 12 | 0.0313 | ARHGAP35, BAD, CCL5, CDK1, CTTN, DBN1, FLNA, HEY2, MED1, PCM1, TACSTD2, TP53                                                                                                                                                                          |
| GO:0048247 | lymphocyte chemotaxis                                    | 3  | 0.0321 | CCL5, CXCL10, CXCL11                                                                                                                                                                                                                                  |
| GO:0048522 | positive regulation of cellular process                  | 33 | 0.0321 | ARHGAP35, ASS1, BAD, BCLAF1, CCL5, CDK1, CTTN, CUL4A, CXCL10, CXCL11, DBNL, DKK1, ERBB2, FLNA, HEY2, HUWE1, IFIT1, IFIT2, IKZF3, IL29, IRS1, LASP1, MARCKSL1, PCM1, PEA15, PLEKHF1, PXN, SPTBN1, TACSTD2, TEAD2, TP53, VAPB, YAP1                     |
| GO:0043933 | macromolecular complex subunit organization              | 21 | 0.0325 | AHNAK, BAD, C17orf49, CCL5, CTTN, DBN1, DBNL, FLNA, FMOD, H1FX, HEY2, HIRIP3, HUWE1, MAP4, MCM2, PCM1, PXN, SET, SMARCC1, TP53, UPK1A                                                                                                                 |
| GO:0048518 | positive regulation of biological process                | 36 | 0.0344 | ARFGEF2, ASS1, BAD, BCLAF1, CCL5, CDK1, CTTN, CUL4A, CXCL10, CXCL11, DBNL, DKK1, ERBB2, FLNA, HEY2, HUWE1, IFIT1, IFIT2, IKZF3, IL28A, IL29, IRS1, LASP1, MARCKSL1, PCM1, PEA15, PIP, PLEKHF1, PXN, SPTBN1, TACSTD2, TBC1D9B, TEAD2, TP53, VAPB, YAP1 |
| GO:0045596 | negative regulation of cell differentiation              | 11 | 0.0357 | CUL4A, CXCL10, DKK1, ERBB2, HEY2, IL29, MED1, PCM1, TACSTD2, TP53, YAP1                                                                                                                                                                               |

|            |                                                              |    |        |                                                                                                                                                                                                                                                       |
|------------|--------------------------------------------------------------|----|--------|-------------------------------------------------------------------------------------------------------------------------------------------------------------------------------------------------------------------------------------------------------|
| GO:0032388 | positive regulation of intracellular transport               | 8  | 0.0384 | BAD, CXCL10, CXCL11, FLNA, HUWE1, MED1, PCM1, TP53                                                                                                                                                                                                    |
| GO:0071840 | cellular component organization or biogenesis                | 35 | 0.0384 | AHNAK, ARFGEF2, ARHGAP35, C17orf49, C19orf21, CCL5, CDK1, COG3, DBN1, DDX21, DKK1, EMP1, FLNA, FMOD, H1FX, HEY2, HIRIP3, HUWE1, IFIT2, KRT4, MAP4, MCM2, MED1, NEK9, PCM1, PLEC, PLEKHF1, SERPINB5, SET, SMARCC1, SPTBN1, TNKS1BP1, UPK1A, VAPB, YAP1 |
| GO:2001244 | positive regulation of intrinsic apoptotic signaling pathway | 4  | 0.0384 | BAD, BCLAF1, PLEKHF1, TP53                                                                                                                                                                                                                            |
| GO:0042981 | regulation of apoptotic process                              | 16 | 0.0444 | BCLAF1, CCL5, CDK1, CTTN, FLNA, HEY2, IFIT2, IFIT3, IKZF3, MED1, PCM1, PIP, PLEKHF1, SET, TP53, YAP1                                                                                                                                                  |
| GO:0006356 | regulation of transcription from RNA polymerase I promoter   | 3  | 0.0452 | ERBB2, FLNA, MED1                                                                                                                                                                                                                                     |
| GO:0006461 | protein complex assembly                                     | 13 | 0.0461 | AHNAK, BAD, CCL5, CTTN, DBNL, FLNA, FMOD, H1FX, MCM2, PXN, SET, TP53, UPK1A                                                                                                                                                                           |
| GO:0007166 | cell surface receptor signaling pathway                      | 20 | 0.0461 | CCL5, CDK1, CXCL10, CXCL11, DKK1, ERBB2, FMOD, HERC5, HEY2, IFIT1, IFIT2, IFIT3, IRS1, OAS2, P2RY10, PCM1, PXN, SMARCC1, SPTBN1, TACSTD2                                                                                                              |
| GO:0016043 | cellular component organization                              | 34 | 0.0461 | AHNAK, ARFGEF2, ARHGAP35, C17orf49, C19orf21, CCL5, CDK1, COG3, DBN1, DKK1, EMP1, FLNA, FMOD, H1FX, HEY2, HIRIP3, HUWE1, IFIT2, KRT4, MAP4, MCM2, MED1, NEK9, PCM1, PLEC, PLEKHF1, SERPINB5, SET, SMARCC1, SPTBN1, TNKS1BP1, UPK1A, VAPB, YAP1        |
| GO:0050678 | regulation of epithelial cell proliferation                  | 7  | 0.0461 | BAD, CCL5, ERBB2, KRT4, SERPINB5, TACSTD2, YAP1                                                                                                                                                                                                       |
| GO:0050767 | regulation of neurogenesis                                   | 10 | 0.0461 | ARHGAP35, CCL5, CDK1, CTTN, DBN1, HEY2, MED1, PCM1, TP53, YAP1                                                                                                                                                                                        |
| GO:0070271 | protein complex biogenesis                                   | 13 | 0.0461 | AHNAK, BAD, CCL5, CTTN, DBNL, FLNA, FMOD, H1FX, MCM2, PXN, SET, TP53, UPK1A                                                                                                                                                                           |
| GO:0071396 | cellular response to lipid                                   | 8  | 0.0461 | ASS1, BAD, CCL5, CXCL10, MED1, PCM1, TEAD2, YAP1                                                                                                                                                                                                      |
| GO:2001235 | positive regulation of apoptotic signaling pathway           | 6  | 0.0461 | BAD, BCLAF1, PCM1, PEA15, PLEKHF1, TP53                                                                                                                                                                                                               |
| GO:0048523 | negative regulation of cellular process                      | 30 | 0.0462 | ASS1, BAD, BCLAF1, BPIFB1, CCL5, CD276, CTTN, CXCL10, DKK1, ERBB2, FLNA, HEY2, IFIT1, IFIT3, IL29, IRS1, KRT4, MED1, PCM1, PEA15, PIP, SERPINB5, SET, SMARCC1, SPTBN1, TACSTD2, TCEAL1, TEAD2, TP53, VAPB                                             |
| GO:0048584 | positive regulation of response to stimulus                  | 19 | 0.0475 | BCLAF1, CCL5, CDK1, CXCL10, CXCL11, DBNL, ERBB2, FLNA, IL28A, IL29, IRS1, LASP1, MED1, PCM1, PEA15, PLEKHF1, PXN, TP53, YAP1                                                                                                                          |

**Table S4.** Correlation between YAP1 and TAZ abundance levels, as determined by IHC, in the cohort of 58 samples.

| Molecular, clinical and pathological indicator |                   | Number of samples (n=58) | %    | Low-level TAZ (n=44) |      | High-level TAZ (n=14) |      | p (from $\chi^2$ test) |
|------------------------------------------------|-------------------|--------------------------|------|----------------------|------|-----------------------|------|------------------------|
|                                                |                   |                          |      | N                    | %    | N                     | %    |                        |
| TAZ expression                                 |                   | 58                       |      | 44                   | 75.9 | 14                    | 24.1 |                        |
| YAP1 expression                                |                   |                          |      |                      |      |                       |      | < 0.001                |
|                                                | Low level         | 46                       | 79.3 | 42                   | 91.3 | 4                     | 8.7  |                        |
|                                                | High level        | 12                       | 20.7 | 2                    | 16.7 | 10                    | 83.3 |                        |
| Age (years) (median, range)                    |                   | 51 (32-86)               |      |                      |      |                       |      |                        |
| Hormonal status                                |                   |                          |      |                      |      |                       |      | 0.22                   |
|                                                | Premenopausal     | 29                       | 50   | 24                   | 82.8 | 5                     | 17.2 |                        |
|                                                | Postmenopausal    | 29                       | 50   | 20                   | 69   | 9                     | 31   |                        |
| Type of breast cancer*                         |                   |                          |      |                      |      |                       |      | 0.569                  |
|                                                | NOS               | 57                       | 98.3 | 43                   | 75.4 | 14                    | 24.6 |                        |
|                                                | ILC               | 1                        | 1.7  | 1                    | 100  | 0                     | 0    |                        |
| Histological grade                             |                   |                          |      |                      |      |                       |      | 0.663                  |
|                                                | G1                | 1                        | 1.7  | 100                  | 0    | 0                     | 1    |                        |
|                                                | G2                | 37                       | 63.8 | 78.4                 | 8    | 21.6                  | 29   |                        |
|                                                | G3                | 20                       | 34.5 | 70                   | 6    | 30                    | 14   |                        |
| ER status                                      |                   |                          |      |                      |      |                       |      | 0.766                  |
|                                                | Negative          | 31                       | 53.4 | 24                   | 77.4 | 7                     | 22.6 |                        |
|                                                | Positive          | 27                       | 46.6 | 20                   | 74.1 | 7                     | 25.9 |                        |
| PR status                                      |                   |                          |      |                      |      |                       |      | 0.702                  |
|                                                | Negative          | 39                       | 67.2 | 29                   | 74.4 | 10                    | 25.6 |                        |
|                                                | Positive          | 19                       | 32.8 | 15                   | 78.9 | 4                     | 21.1 |                        |
| Proliferation (Ki-67)                          |                   |                          |      |                      |      |                       |      | 0.634                  |
|                                                | <20%              | 10                       | 17.2 | 7                    | 70   | 3                     | 30   |                        |
|                                                | ≥20%              | 48                       | 82.8 | 37                   | 77.1 | 11                    | 22.9 |                        |
| Progression                                    |                   |                          |      |                      |      |                       |      | < 0.001                |
|                                                | Long progression  | 49                       | 84.5 | 43                   | 97.7 | 6                     | 42.9 |                        |
|                                                | Early progression | 9                        | 15.5 | 1                    | 2.3  | 8                     | 57.1 |                        |

\* Type of breast cancer: NOS: invasive ductal carcinoma, not otherwise specified; ILC: invasive lobular carcinoma.

**Table S5.** Multivariate analysis of YAP1 expression and clinical and pathological indicators. Hormonal status and YAP1 act as prognostic factors, independently of all the other clinical and pathological indicators. HR: hazard ratio; CI: confidence interval.

| Indicator       | HR    | 95% CI |        | p     |
|-----------------|-------|--------|--------|-------|
|                 |       | Lower  | Upper  |       |
| Hormonal status | 2.880 | 1.005  | 8.251  | <0.05 |
| ER status       | 0.707 | 0.265  | 1.888  | 0.489 |
| YAP1 expression | 4.789 | 1.776  | 12.911 | <0.01 |

**Table S6.** List of primers. The forward (FW) and reverse (RV) sequences of each primer used in this study is provided.

| qPCR Primer | Sequence (5'-3')        |
|-------------|-------------------------|
| AREG-FW     | GTTATTACAGTCCAGCTTAGAAG |
| AREG-RV     | CATGTACATTTCATTCTCTTG   |
| ATP5E-FW    | CCGGCGTCTTGCGGATTTC     |
| ATP5E-RV    | GATCTGGGAGTATCGGATG     |
| CTGF-FW     | GTTACCAATGACAACGCCTC    |
| CTGF-RV     | GAGTACGGATGCACTTTTTG    |
| CYR61-FW    | GTTACCAATGACAACCCGTAG   |
| CYR61-RV    | GGGATTTCTTGGTCTTGCTG    |
| TAZ-FW      | CAAGTCGGCTGTGGAGATG     |
| TAZ-RV      | CTGGAGGTGGTTGTGGAGC     |
| TEAD1-FW    | GAAAACATGGAAAGGATGAGTG  |
| TEAD1-RV    | GGCTATCAATTCATTCTACC    |
| TEAD2-FW    | GAGCGATACATGATGAACAG    |
| TEAD2-RV    | GGAGACCTCGAAGACATAGG    |
| TEAD3-FW    | GATTGCACGCTATATTAACTGAG |
| TEAD3-RV    | CTTGATGCCAACCCTGGTACTC  |
| TEAD4-FW    | CTTTCTCTCAGCAAACCTATG   |
| TEAD4-RV    | GAGAACTCCAACATCCAGAG    |
| VEGFA-FW    | TGTCTTGGGTGCATTGGAG     |
| VEGFA-RV    | GATTCTGCCCTCCTCTTCTG    |
| YAP1-FW     | GGCTGAAACAGCAAGAACTG    |
| YAP1-RV     | GAAGACACTGGATTTTGAGTC   |

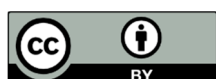

Supplement: Supplementary file 1 [file cancers-12-01108-s001.pdf]
